# Supplementary material for: Amelioration of amyloid-β-induced deficits by DcR3 in an Alzheimer’s disease model
Source: Springer Nature journal article supplement (doi:10.1186/s13024-017-0173-0), 2017-04-24
Supplement: MOESM1 [file 12244258]

**Additional file 1: Table S1: List of the real-time PCR primers sets (5'-3') for the target genes.****Additional file 1: Table S1: Real-Time PCR primer sets(5'-3')**

|               | Forward Primer           | Reverse Primer           |
|---------------|--------------------------|--------------------------|
| TNF- $\alpha$ | TCCAGGCGGTGCCTATGT       | CGATCACCCCGAAGTTCAGT     |
| IL-1 $\beta$  | GATGATAACCTGCTGGTGTGTGA  | GTTGTTTCATCTCGGAGCCTGTAG |
| IL-6          | ACCACGGCCTTCCCTACTTC     | TCTGTTGGGAGTGGTATCCTCTGT |
| MR            | CCCAAGGGCTCTTCTAAAGCA    | AACGCCGGCACCTATCAC       |
| CCL17         | CTGCTCGAGCCACCAATGTA     | GGAATGGCCCCTTTGAAGTAA    |
| YM1           | TTCTGGTGAAGGAAATGCGTAAA  | GCAGCCTTGGAATGTCTTTCTC   |
| IL-10         | GCCCAGAAATCAAGGAGCATT    | CGCATCCTGAGGGTCTTCA      |
| TGF $\beta$   | AACCCCATTTGCTGTCCCGTG    | GCGCTGAATCGAAAGCCCTGT    |
| ARG1          | AGCCGCTGGAACCCAGAGAGA    | TGGACCTCTGCCACCACACCA    |
| IL-18         | ACTGTACAACCGCAGTAATAC    | AGTGAACATTACAGATTTATCCC  |
| ASC           | GACAGTACCAGGCAGTTCGT     | AGTCCTTGCAGGTCAGGTTC     |
| NLRP3         | GTGAAACAAAACGTGCCTTAGAAG | CCACGCCTACCAGGAAATCTC    |
| GAPDH         | GCATCCACTGGTGCTGCC       | TCATCATACTGGCAGGTTTC     |
