# Supplementary material for: Amelioration of amyloid-β-induced deficits by DcR3 in an Alzheimer’s disease model
Source: Springer Nature journal article supplement (doi:10.1186/s13024-017-0173-0), 2017-04-24
Supplement: MOESM2 [file 12244258]

**Additional file 2: Table S2: Statement on sample size and statistical measures.**

| <b>Fig</b>       | <b>Sample size</b>                                                                                                                                                                                                                                                                         | <b>Definitions of statistical methods and measures</b> |
|------------------|--------------------------------------------------------------------------------------------------------------------------------------------------------------------------------------------------------------------------------------------------------------------------------------------|--------------------------------------------------------|
| <b>1a, b, c</b>  | n = 9, WT; n = 8, DcR3; n = 7, APP; n = 7, APP/DcR3.                                                                                                                                                                                                                                       | one-way ANOVA                                          |
| <b>1d, e, f</b>  | n = 5, WT; n = 11, DcR3; n = 7, APP; n = 10, APP/DcR3.                                                                                                                                                                                                                                     | one-way ANOVA                                          |
| <b>1 g, h</b>    | Mouse numbers: n = 40, WT; n = 8, DcR3; n = 37, APP; n = 6, APP/DcR3.                                                                                                                                                                                                                      | one-way ANOVA                                          |
| <b>2a, b</b>     | Slices for CA3: n = 8, WT; n = 7, DcR3; n = 10, APP; n = 10, APP/DcR3.<br>Slices for CA1: n = 14, WT; n = 10, DcR3; n = 13, APP; n = 14, APP/DcR3.<br>Slices for DG: n = 14, WT; n = 12, DcR3; n = 13, APP; n = 13, APP/DcR3.<br>Each quantitative data from at least 3 mice per genotype. | one-way ANOVA                                          |
| <b>2 c, d</b>    | n = 5 mice per genotype.                                                                                                                                                                                                                                                                   | one-way ANOVA                                          |
| <b>3b,c,e,f</b>  | Data were obtained from three independent experiments, and each treatment performed in quadruplicating.                                                                                                                                                                                    | one-way ANOVA                                          |
| <b>3d</b>        | Data were obtained from more than four independent experiments, and each treatment performed in quadruplicating.                                                                                                                                                                           | one-way ANOVA                                          |
| <b>4 a, b</b>    | Mouse numbers: n = 6, APP; n = 4, APP/DcR3.<br>Slice numbers: n = 34, APP; n = 24, APP/DcR3.                                                                                                                                                                                               | two-tailed unpaired Student's t test.                  |
| <b>4 c, d</b>    | n = 6 mice per genotype.                                                                                                                                                                                                                                                                   | two-tailed unpaired Student's t test.                  |
| <b>5 a, b</b>    | Number of plaques analyzed: APP = 342, APP/DcR3 = 324. Each quantitative data from at least 3 mice per genotype.                                                                                                                                                                           | two-tailed unpaired Student's t test.                  |
| <b>5 c, d</b>    | Cell numbers: n=76, oA $\beta$ ; n=74, oA $\beta$ +DcR3.                                                                                                                                                                                                                                   | two-tailed unpaired Student's t test.                  |
| <b>6 a, b, c</b> | Mouse numbers in TNF- $\alpha$ ELISA: n = 14, APP; n = 8, APP/DcR3; Mouse numbers in IL-1 $\beta$ ELISA: n = 16, APP; n = 8, APP/DcR3; Mouse numbers in YM1 mRNA level: n = 15, APP; n = 7, APP/DcR3; Mouse numbers in YM1 ELISA: n = 9, APP; n = 6, APP/DcR3;                             | two-tailed unpaired Student's t test.                  |
| <b>6 d</b>       | n = 3 per treatment                                                                                                                                                                                                                                                                        | one-way ANOVA                                          |
| <b>7d</b>        | Data were obtained from three independent experiments, and each treatment performed in quadruplicating.                                                                                                                                                                                    | One-way ANOVA                                          |
| <b>S1 b</b>      | n = 6 mice per genotype.                                                                                                                                                                                                                                                                   | One-way ANOVA                                          |

|                |                                                                                                                                                                                                             |                                       |
|----------------|-------------------------------------------------------------------------------------------------------------------------------------------------------------------------------------------------------------|---------------------------------------|
| <b>S1 c</b>    | Mouse numbers: n = 18, WT; n = 21, DcR3; n = 21, APP; n = 22, APP/DcR3.                                                                                                                                     | One-way ANOVA                         |
| <b>S2 b, c</b> | Mouse numbers for CA3: n = 11, WT; n = 8, DcR3; n = 13, APP; n = 12, APP/DcR3; CA1: n = 12, WT; n = 8, DcR3; n = 13, APP; n = 12, APP/DcR3; and DG: n = 11, WT; n = 7, DcR3; n = 11, APP; n = 12, APP/DcR3. | One-way ANOVA                         |
| <b>S3</b>      | Experiments were conducted for over 5 times with 3 regions for each treatment.                                                                                                                              | One-way ANOVA                         |
| <b>S4</b>      | n = 4 per treatment                                                                                                                                                                                         | one-way ANOVA                         |
| <b>S5</b>      | Slice numbers: n = 8<br>Each quantitative data from 4 mice per genotype.                                                                                                                                    | two-tailed unpaired Student's t test. |
| <b>S7</b>      | Sample numbers are presented in figures.                                                                                                                                                                    | one-way ANOVA                         |
| <b>S8 a, b</b> | Slice numbers: n = 14, APP; n = 13, APP/DcR3.<br>Each quantitative data from 4 mice per genotype.                                                                                                           | two-tailed unpaired Student's t test. |
| <b>S9 b</b>    | Data were obtained from two independent experiments, and each treatment performed in duplicating.                                                                                                           | one-way ANOVA                         |

Data are presented as the mean  $\pm$ s.e.m. from at least three independent experiments and were analyzed using Prism software (GraphPad) to determine the statistical significance of the difference. Differences between data sets were analyzed by Unpaired, two-tailed Student's *t*-tests or one-way ANOVA followed with the Bonferroni post hoc test. During multiple contrast analysis, the alpha was set as 0.05 (95% confidence intervals). A *p* value less than 0.05 was considered to be statistically significant.
