# Supplementary material for: Amelioration of amyloid-β-induced deficits by DcR3 in an Alzheimer’s disease model
Source: Springer Nature journal article supplement (doi:10.1186/s13024-017-0173-0), 2017-04-24
Supplement: MOESM3 [file 12244258]

### ADDITIONAL FILE 3: FIGURE S1

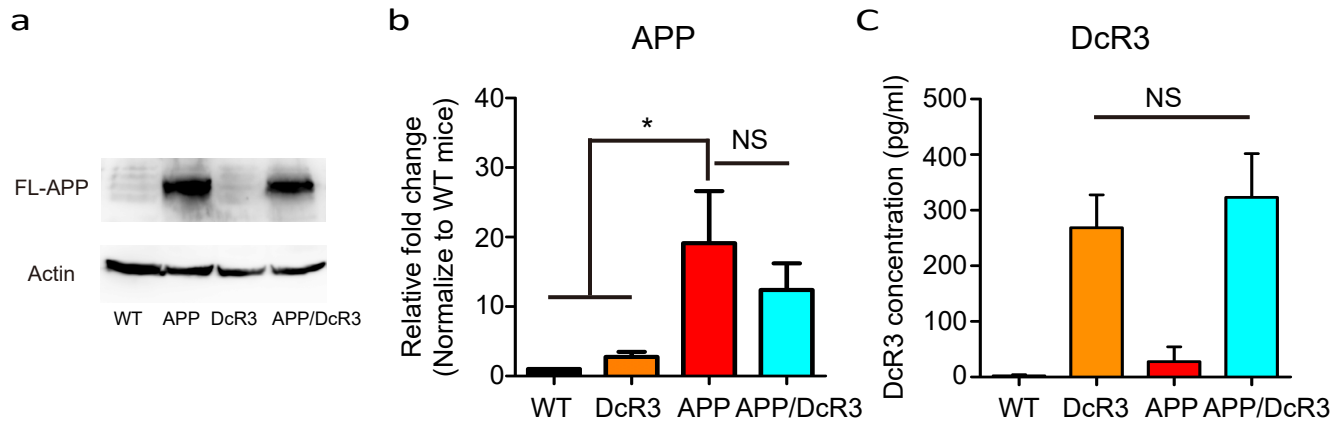

**Additional file 3: Figure S1: Full-length APP and DcR3 expression in four genotypes of mice at 6 months of age.**

(a, b) Levels of full-length APP did not change between the APP and APP/DcR3 mice (c) Levels of DcR3 did not change between the DcR3 and APP/DcR3 mice (N = 18-22 mice per genotype). \* $P \leq 0.05$ . NS, not significant.
