# Supplementary material for: Amelioration of amyloid-β-induced deficits by DcR3 in an Alzheimer’s disease model
Source: Springer Nature journal article supplement (doi:10.1186/s13024-017-0173-0), 2017-04-24
Supplement: MOESM6 [file 12244258]

## ADDITIONAL FILE 6: FIGURE S4

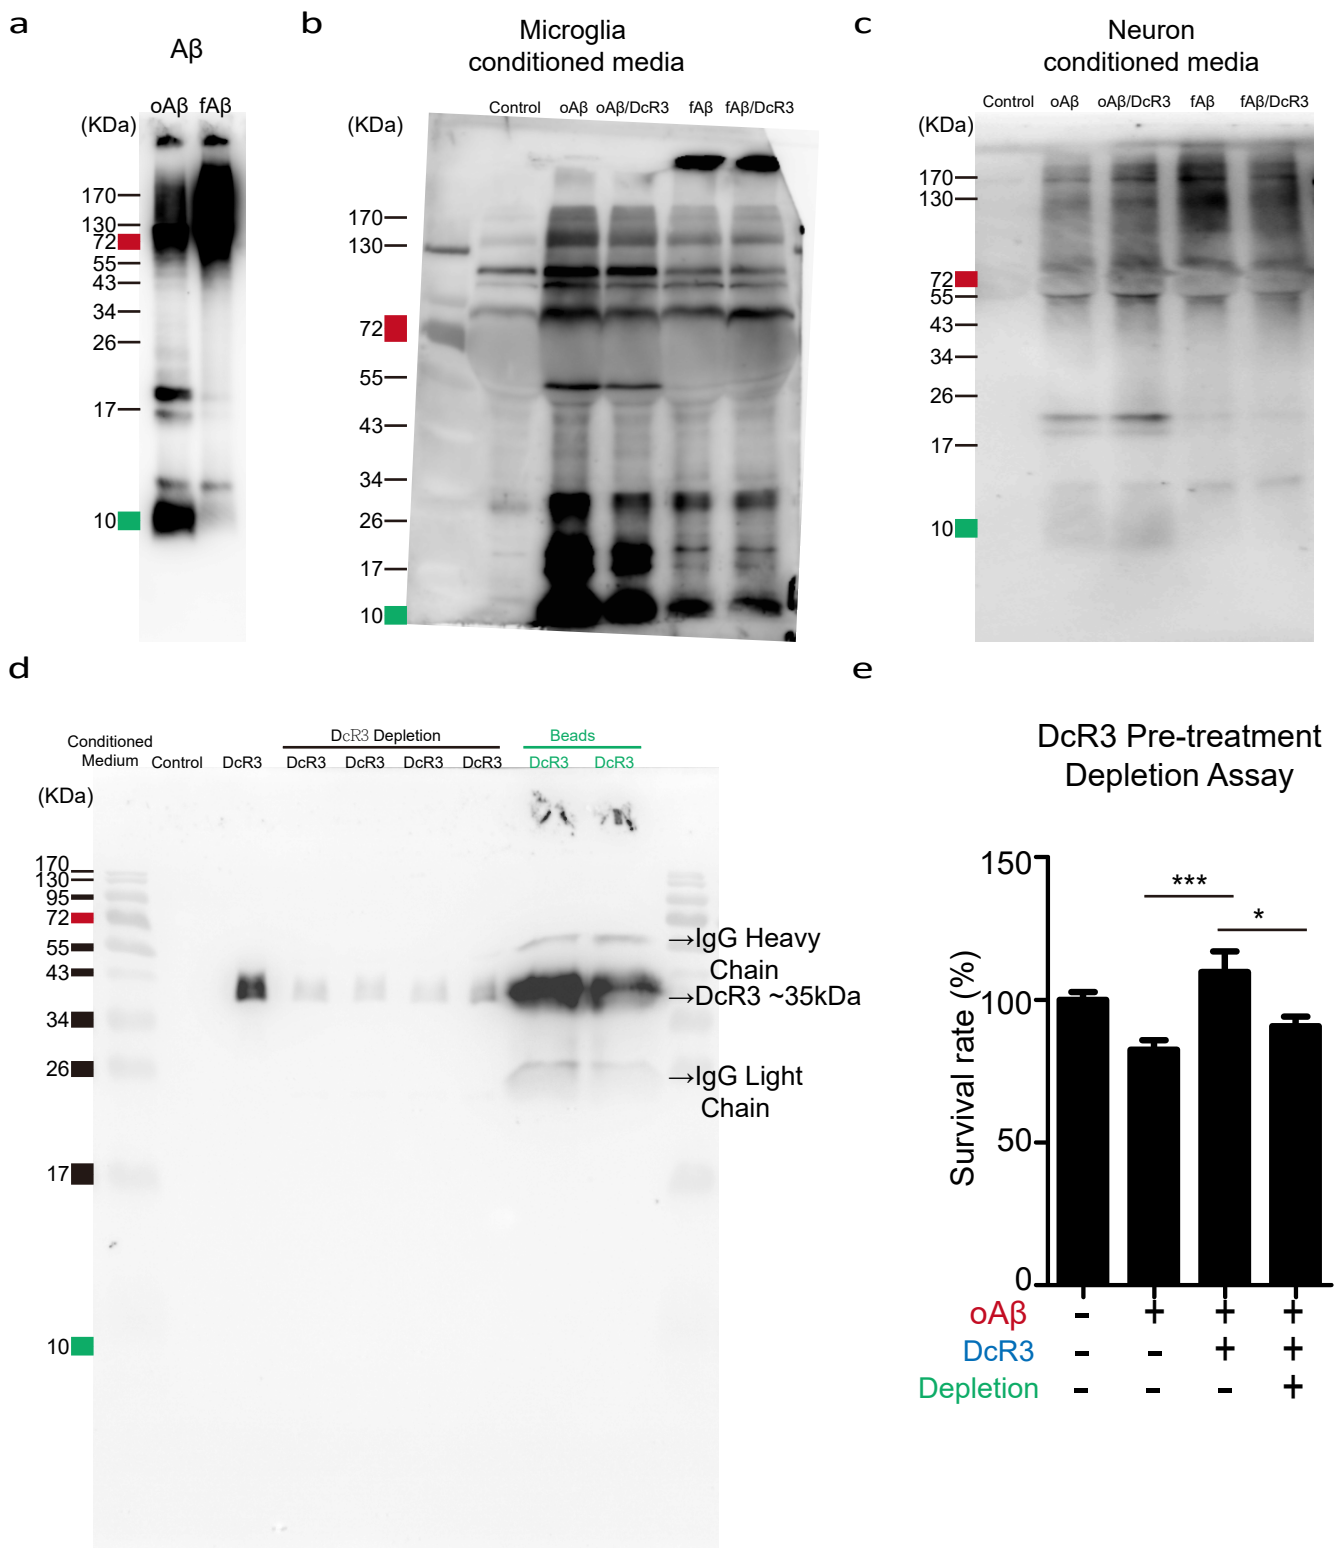

### Additional file 6: Figure S4: A $\beta$ aggregation status and DcR3 immuno-depletion control for the conditioned media experiment.

(a-c) Western blotting were applied to determine the aggregation state of A $\beta$  peptide in (a) fresh prepared oA $\beta$  or fA $\beta$ , (b) after 72 hours incubating with microglia, (c) after 72 hours incubating with neuron. (d) Representative Western blotting image of DcR3 protein levels after immuno-depletion. (e) DcR3 depletion conditioned treatment had no protective function on neuronal survival under A $\beta$  stress (n=4). \*P  $\leq$  0.05, \*\*\*P  $\leq$  0.001. The neuronal survival rate of DcR3 Depletion conditioned media treatment was reduced compared to oA $\beta$ /DcR3 treatment.
