# Supplementary material for: Amelioration of amyloid-β-induced deficits by DcR3 in an Alzheimer’s disease model
Source: Springer Nature journal article supplement (doi:10.1186/s13024-017-0173-0), 2017-04-24
Supplement: MOESM7 [file 12244258]

## ADDITIONAL FILE 7: FIGURE S5

a

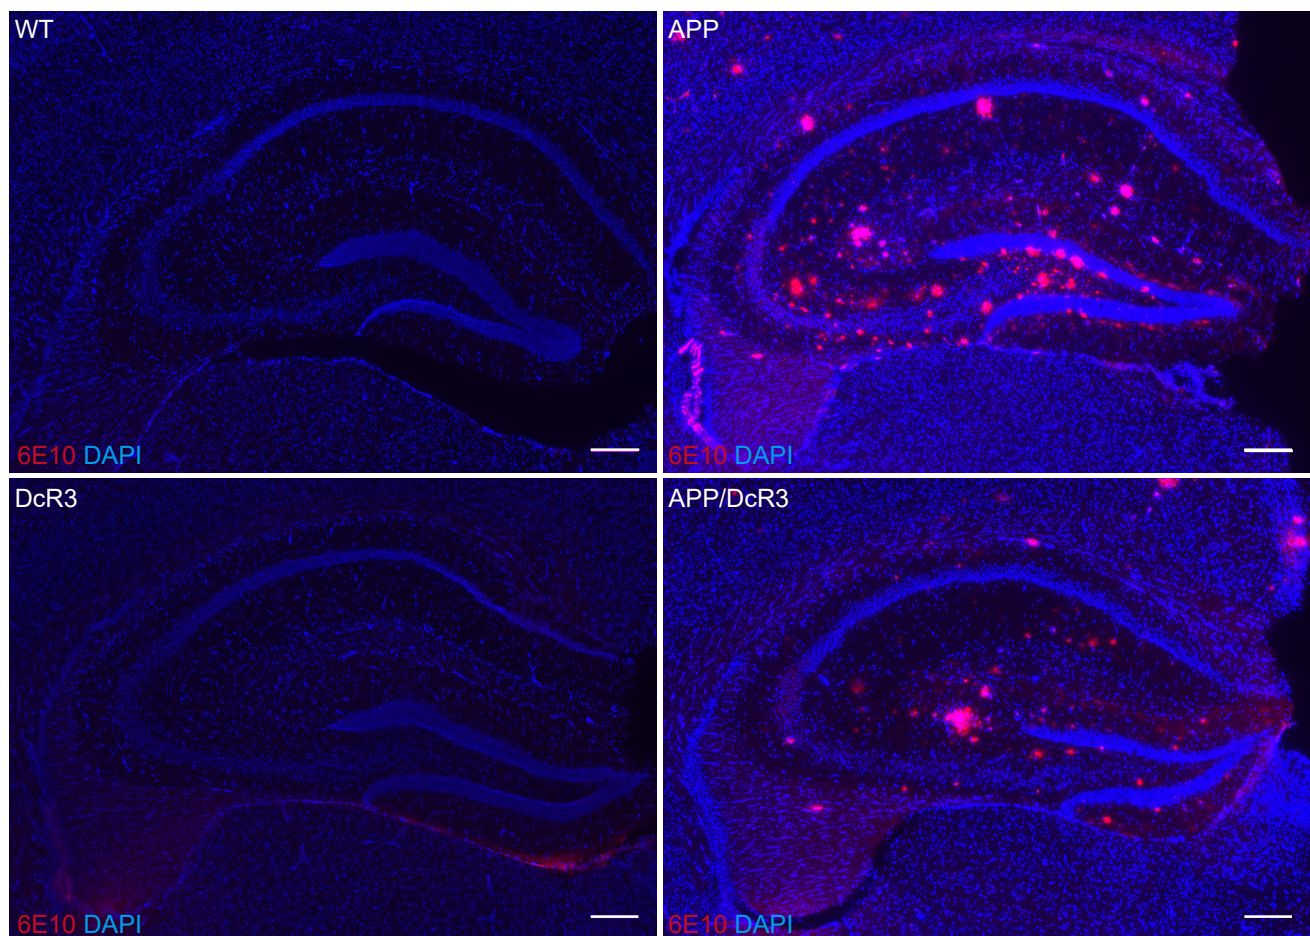

b

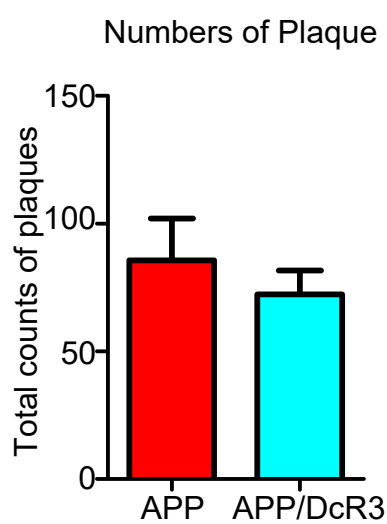

c

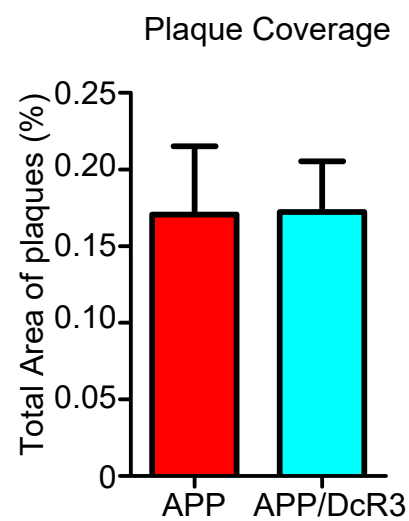

### Additional file 7: Figure S5: Effect of DcR3 on A $\beta$ deposition in the hippocampus.

(a) Immunostaining of total A $\beta$  (6E10, Red) and nucleus (DAPI, Blue) of the hippocampus. *Scale bar: 200  $\mu$ m.* (b, c) Quantification data of (b) total numbers of A $\beta$  plaques and (c) plaque coverage (N = 4 mice per genotype, N=8 brain slices per mouse).
