# Supplementary material for: Amelioration of amyloid-β-induced deficits by DcR3 in an Alzheimer’s disease model
Source: Springer Nature journal article supplement (doi:10.1186/s13024-017-0173-0), 2017-04-24
Supplement: MOESM8 [file 12244258]

**ADDITIONAL FILE 8: FIGURE S6**

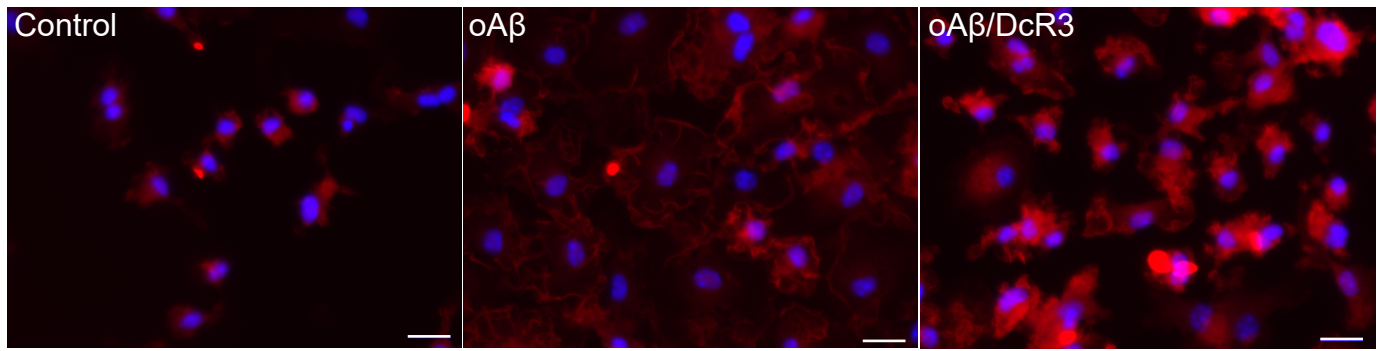

**Additional file 8: Figure S6: Morphological changes of microglia *in vitro* under A $\beta$  or A $\beta$ /DcR3 treatment.**

The representative fluorescent images were labeled with microglia marker (Iba1, red) and nucleus (DAPI, blue) in microglia culture. *Scale bar: 20  $\mu$ m.*
