# Supplementary material for: Amelioration of amyloid-β-induced deficits by DcR3 in an Alzheimer’s disease model
Source: Springer Nature journal article supplement (doi:10.1186/s13024-017-0173-0), 2017-04-24
Supplement: MOESM9 [file 12244258]

**ADDITIONAL FILE 9: FIGURE S7**

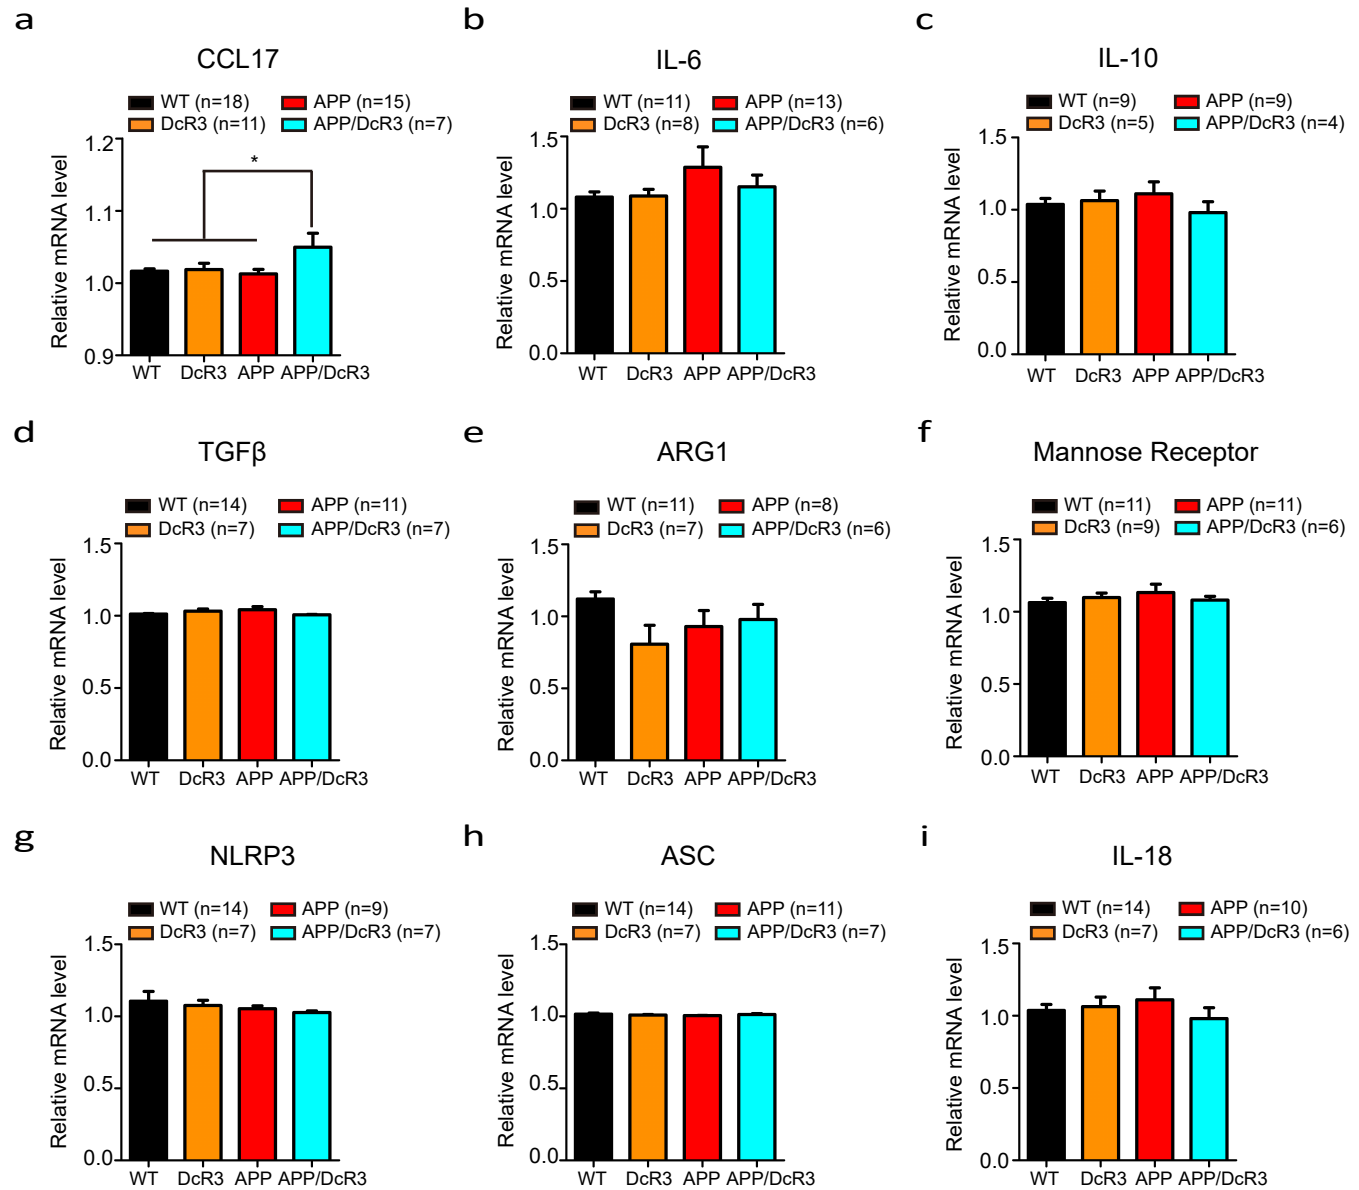

**Additional file 9: Figure S7: Expression inflammatory-related genes in mice of four genotypes.**

The mRNA levels of (a) M2a, (b, c) M2b, (c-f) M2c, and (g-i) inflammasome related proteins were examined by using qPCR. \*P ≤ 0.05.
