# Supplementary material for: Amelioration of amyloid-β-induced deficits by DcR3 in an Alzheimer’s disease model
Source: Springer Nature journal article supplement (doi:10.1186/s13024-017-0173-0), 2017-04-24
Supplement: MOESM11 [file 12244258]

## ADDITIONAL FILE 11: FIGURE S9

a

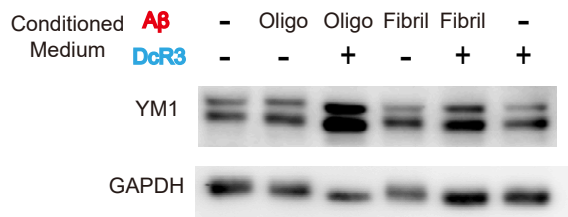

b

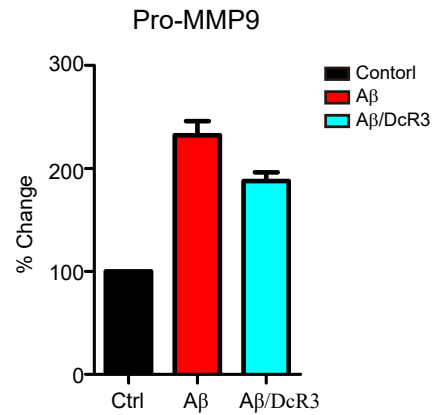

### Additional file 11: Figure S9: Identifying protein expression patterns in primary microglia lysates and CM.

(a) DcR3 promoted more YM1 secretion in the A $\beta$  treated primary microglia culture according to the immunoblotting analysis. GAPDH was used as a loading control. (b) The changes in pro-MMP9 levels in the cytokine array analysis.
