# Supplementary material for: Amelioration of amyloid-β-induced deficits by DcR3 in an Alzheimer’s disease model
Source: Springer Nature journal article supplement (doi:10.1186/s13024-017-0173-0), 2017-04-24
Supplement: MOESM12 [file 12244258]

**Additional file 12: Table S3: List of the C3 cytokine array data.**

| Target       | MEAN $\pm$ SEM  |                      |                      |
|--------------|-----------------|----------------------|----------------------|
|              | Control         | oA $\beta$           | oA $\beta$ /DcR3     |
| Axl          | 100 $\pm$ 16.3  | 0 $\pm$ 34.4         | 153.2 $\pm$ 7.9      |
| BLC          | 100 $\pm$ 3.1   | 192.7 $\pm$ 20.4     | 100.6 $\pm$ 3.2      |
| CD30L        | 100 $\pm$ 5.5   | 268.3 $\pm$ 43.6     | 83. $\pm$ 7.9        |
| CD30         | 100 $\pm$ 7.4   | 144.7 $\pm$ 26.1     | 128.7 $\pm$ 10.5     |
| CD40         | 100 $\pm$ 7.7   | 169.3 $\pm$ 25.7     | 0 $\pm$ 58.7         |
| CRG-2        | 100 $\pm$ 4.1   | 224.8 $\pm$ 31.3     | 123.9 $\pm$ 10.5     |
| CTACK        | 100 $\pm$ 1.4   | 183.5 $\pm$ 15       | 113.2 $\pm$ 5        |
| CXCL16       | 100 $\pm$ 1.1   | 136.3 $\pm$ 6.9      | 201.3 $\pm$ 31.3     |
| Eotaxin1     | 100 $\pm$ 3.9   | 101.3 $\pm$ 14.5     | 26.1 $\pm$ 12.2      |
| Eotaxin2     | 100 $\pm$ 1.4   | 85.4 $\pm$ 4.6       | 96.7 $\pm$ 1.1       |
| FasL         | 100 $\pm$ 2.9   | 105.2 $\pm$ 3.2      | 95.2 $\pm$ 1.8       |
| CX3CL1       | 100 $\pm$ 7.8   | 139.5 $\pm$ 5.8      | 93.2 $\pm$ 2.8       |
| GCSF         | 100 $\pm$ 1.4   | 197.4 $\pm$ 6.7      | 194.6 $\pm$ 4.6      |
| GM-CSF       | 100 $\pm$ 10.3  | 158.9 $\pm$ 13.8     | 142.5 $\pm$ 7.1      |
| IFN-gamma    | 100 $\pm$ 34    | 0 $\pm$ 105.3        | 0 $\pm$ 73.8         |
| IGFBP3       | 100 $\pm$ 2.1   | 172.1 $\pm$ 13.5     | 136.1 $\pm$ 4.5      |
| IGFBP5       | 100 $\pm$ 1.4   | 113. $\pm$ 5.6       | 87.6 $\pm$ 1.6       |
| IGFBP6       | 100 $\pm$ 1.5   | 32.5 $\pm$ 15.7      | 70.9 $\pm$ 4.3       |
| IL-1alpha    | 100 $\pm$ 2.3   | 236.4 $\pm$ 19.7     | 112.5 $\pm$ 7.5      |
| IL-1beta     | 100 $\pm$ 2.2   | 232.2 $\pm$ 34.3     | 96.2 $\pm$ 5.6       |
| IL-2         | 100 $\pm$ 2.9   | 278.5 $\pm$ 42.9     | 147.2 $\pm$ 13.3     |
| IL-3         | 100 $\pm$ 12.5  | 457.7 $\pm$ 88.2     | 164.2 $\pm$ 21.4     |
| IL-3 Rb      | 100 $\pm$ 4.1   | 482.8 $\pm$ 87.6     | 260.7 $\pm$ 41.1     |
| IL-4         | 100 $\pm$ 1     | 66.5 $\pm$ 12.7      | 125.5 $\pm$ 3.6      |
| IL-5         | 100 $\pm$ 2.7   | 125.9 $\pm$ 11.1     | 191.7 $\pm$ 11       |
| IL-6         | 100 $\pm$ 0.9   | 214.9 $\pm$ 10.2     | 245.4 $\pm$ 12.1     |
| IL-9         | 100 $\pm$ 1.6   | 211.8 $\pm$ 19.4     | 120.7 $\pm$ 3.7      |
| IL-10        | 100 $\pm$ 13.3  | 211.5 $\pm$ 13.1     | 222.4 $\pm$ 10.4     |
| IL-12 p40/70 | 100 $\pm$ 2     | 4883.6 $\pm$ 640.2   | 4505.9 $\pm$ 446.1   |
| IL-12 p70    | 100 $\pm$ 5.5   | 0 $\pm$ 103.2        | 0 $\pm$ 54.9         |
| IL-13        | 100 $\pm$ 1.6   | 143. $\pm$ 6.1       | 109.7 $\pm$ 4.8      |
| IL-17        | 100 $\pm$ 2.9   | 136.9 $\pm$ 9.4      | 134.3 $\pm$ 20.6     |
| CXCL1        | 100 $\pm$ 0.6   | 169.5 $\pm$ 11       | 138.1 $\pm$ 3.2      |
| Leptin R     | 100 $\pm$ 4.2   | 883.8 $\pm$ 182      | 445.9 $\pm$ 79.1     |
| Leptin       | 100 $\pm$ 0.6   | 169.9 $\pm$ 13.9     | 171.1 $\pm$ 15.7     |
| CXCL5        | 100 $\pm$ 0.7   | 163.1 $\pm$ 14.9     | 113.5 $\pm$ 4.1      |
| L Selectin   | 100 $\pm$ 458.4 | 23259.8 $\pm$ 5345.8 | 12678.7 $\pm$ 3023.1 |
| Ltn/XCL1     | 100 $\pm$ 1     | 91.4 $\pm$ 7.4       | 104. $\pm$ 2.7       |
| MCP1         | 100 $\pm$ 0.8   | 110.5 $\pm$ 3.4      | 119.9 $\pm$ 2.7      |

|             |         |            |            |
|-------------|---------|------------|------------|
| MCP5        | 100±0.9 | 119.3±1.8  | 140.6±3.2  |
| M-CSF       | 100±2.7 | 152.3±8.6  | 127.±8     |
| MIG         | 100±0.8 | 122.8±2.9  | 107.4±6.6  |
| MIP-1 alpha | 100±0.6 | 125.1±3    | 122.±1     |
| MIP-1 gamma | 100±0.9 | 129.2±3.6  | 112.8±1.1  |
| MIP-2       | 100±0.5 | 166.1±7.2  | 137.2±1.9  |
| MIP-3 beta  | 100±0.8 | 136.2±4.9  | 92.5±2.4   |
| MIP-3 alpha | 100±0.7 | 209.1±9    | 174.3±3    |
| PF-4        | 100±0.9 | 190.6±8.4  | 140.5±2.2  |
| P Selectin  | 100±1.4 | 209.5±20.6 | 144.2±11.1 |
| RANTES      | 100±0.9 | 118.6±8.1  | 82.2±3.1   |
| SCF         | 100±5.3 | 247.1±32   | 78.8±7     |
| SDF-1 alpha | 100±2.9 | 110.7±7.4  | 99.3±5.4   |
| TARC        | 100±4.3 | 103.6±6.9  | 76.5±6.5   |
| TCA-3       | 100±1.8 | 113.1±3.7  | 86.6±4     |
| TECK        | 100±4.6 | 92.5±7.6   | 53.±7.6    |
| TIMP-1      | 100±2.2 | 113.6±3.7  | 98.8±2.1   |
| TNF alpha   | 100±6.9 | 109.7±8.5  | 82.7±11.9  |
| sTNFR1      | 100±1.8 | 109.5±3.3  | 96.2±2.4   |
| sTNFR2      | 100±2   | 130.3±5.2  | 123.4±3.3  |
| TPO         | 100±3.3 | 111.1±6.3  | 81.5±3.6   |
| VCAM-1      | 100±1   | 143.4±4.3  | 109.2±3.2  |
| VEGF        | 100±2.6 | 123.2±11.2 | 70.4±5.8   |

The average intensity of each target in the control group were set as 100. N≥3 for each group
